# Supplementary material for: Spliced Leader Trapping Reveals Widespread Alternative Splicing Patterns in the Highly Dynamic Transcriptome of Trypanosoma brucei
Source: PubMed Central journal article supplement (PMC2916883; doi:10.1371/journal.ppat.1001037), 2010-08-05
Supplement: ppat.1001037.s007.pdf [file ppat.1001037.s007.pdf]

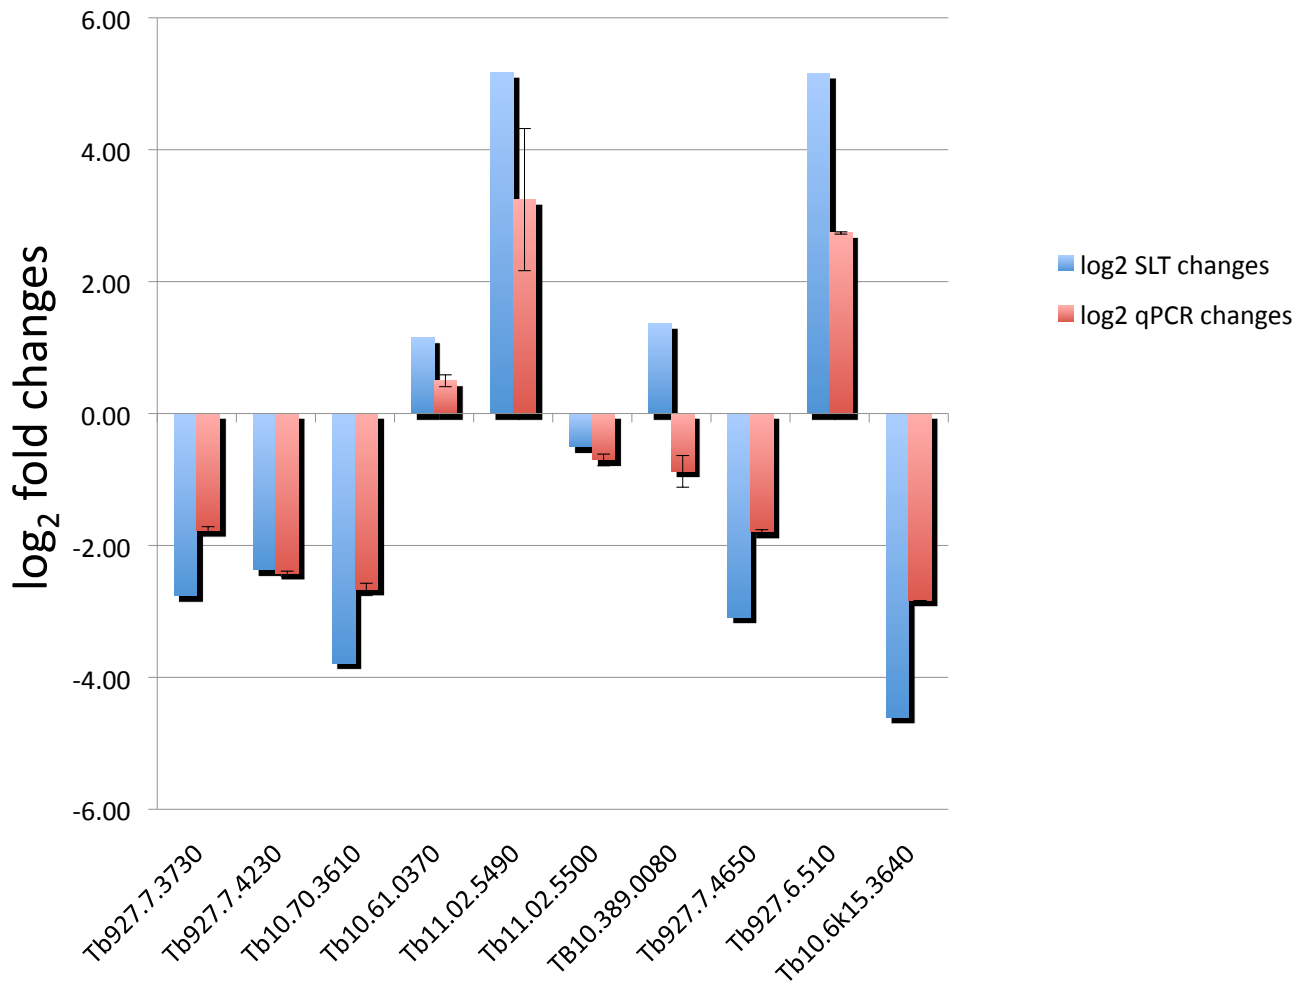

Figure S7
