# Supplementary material for: Spliced Leader Trapping Reveals Widespread Alternative Splicing Patterns in the Highly Dynamic Transcriptome of Trypanosoma brucei
Source: PubMed Central journal article supplement (PMC2916883; doi:10.1371/journal.ppat.1001037), 2010-08-05
Supplement: ppat.1001037.s014.pdf [file ppat.1001037.s014.pdf]

Table S1: Expression level correlation of SLT approach with previous studies

| Gene ID(s)                                                                                        | Name/putative function      | Stage up | Comment                                  | References                                                                                                                                                                         | Fold change |
|---------------------------------------------------------------------------------------------------|-----------------------------|----------|------------------------------------------|------------------------------------------------------------------------------------------------------------------------------------------------------------------------------------|-------------|
| Tb10.6k15.3640                                                                                    | Alternative oxidase         | BSF      | Northern                                 | Chaudhuri et al. J Eukaryot Microbiol. 2002 Jul-Aug;49(4):263-9                                                                                                                    | 23          |
| Tb927.4.4730                                                                                      | Amino acid transporter      | PROC     | Northern (data not shown)                | Robles & Clayton Mol Biochem Parasitol. 2008 Jan;157(1):102-6                                                                                                                      | 16          |
| Tb927.4.3950                                                                                      | CAP5.5/ TbCALP4             | PROC     | qPCR                                     | Olego-Fernandez et al. Protist. 2009 Aug 3. [Epub ahead of print]                                                                                                                  | 5           |
| Tb927.8.8330                                                                                      | CAP5.5V /TbCALP8            | BSF      | qPCR                                     | Olego-Fernandez et al. Protist. 2009 Aug 3. [Epub ahead of print]                                                                                                                  | 15          |
| Tb10.70.0830                                                                                      | Clathrin heavy chain;TbCLH  | BSF      | Northern                                 | Morgan et al. J Cell Sci. 2001 Jul;114(Pt 14):2605-1                                                                                                                               | 10          |
| Tb10.6k15.3510                                                                                    | CRAM                        | PROC     | Northern                                 | Lee et al. Mol Cell Biol. 1990 Sep;10(9):4506-17                                                                                                                                   | 7           |
| Tb927.8.1890                                                                                      | Cytochrome C1               | PROC     | Northern, protein data                   | Torri, A.F. and Hajduk, S.L. (1988) Posttranscriptional regulation of cytochrome c expression during the developmental cycle of Trypanosoma brucei. Mol. Cell. Biol. 8, 4625-4633. | 4           |
| Tb10.6k15.2180                                                                                    | cytochrome oxidase IX       | PROC     | Northern                                 | Mayho et al. Nucleic Acids Res. 2006;34(18):5312-24. Epub 2006 Sep 29                                                                                                              | 3           |
| Tb09.160.1820                                                                                     | cytochrome oxidase V        | PROC     | Northern                                 | Mayho et al. Nucleic Acids Res. 2006;34(18):5312-24. Epub 2006 Sep 29                                                                                                              | 31          |
| Tb10.100.0160                                                                                     | cytochrome oxidase VI       | PROC     | Northern                                 | Mayho et al. Nucleic Acids Res. 2006;34(18):5312-24. Epub 2006 Sep 29                                                                                                              | 8           |
| Tb927.4.4620                                                                                      | cytochrome oxidase VIII     | PROC     | Northern                                 | Mayho et al. Nucleic Acids Res. 2006;34(18):5312-24. Epub 2006 Sep 29                                                                                                              | 16          |
| Tb11.01.4702                                                                                      | cytochrome oxidase X        | PROC     | Northern                                 | Mayho et al. Nucleic Acids Res. 2006;34(18):5312-24. Epub 2006 Sep 29                                                                                                              | 3           |
| Tb927.2.4210                                                                                      | Glycosomal PEPCK            | PROC     | protein data for differential expression | Kueng et al. J Biol Chem. 1989 Mar 25;264(9):5203-9                                                                                                                                | 7           |
| Tb927.2.6000                                                                                      | GPI-phospholipase           | BSF      | Northern                                 | Carrington et al. Mol Biochem Parasitol. 1989 Mar 15;33(3):289-96.                                                                                                                 | 14          |
| Tb927.2.3270;<br>Tb927.2.3280;<br>Tb927.2.3290;<br>Tb927.2.3300;<br>Tb927.2.3310;<br>Tb927.2.3320 | ISG65                       | BSF      | Northern                                 | Ziegelbauer et al. J Biol Chem. 1992 May 25;267(15):10797-803                                                                                                                      | 28          |
| Tb09.211.4511;<br>Tb09.211.4512;<br>Tb09.211.4513                                                 | KMP-11 (basal body protein) | PROC     | protein data for differential expression | Stebbeck et al. Mol Biochem Parasitol. 1995 Apr;71(1):1-1                                                                                                                          | 4           |
| Tb10.70.5110                                                                                      | malate dehydrogenase        | PROC     | Northern                                 | Anderson et al. Exp Parasitol. 1998 May;89(1):63-70                                                                                                                                | 3           |
| Tb927.1.710                                                                                       | PGKB                        | PROC     | Northern                                 | Colasante et al. Mol Biochem Parasitol. 2007 Feb;151(2):193-204.                                                                                                                   | 20          |
| Tb927.1.700                                                                                       | PGKC                        | BSF      | Northern                                 | Colasante et al. Mol Biochem Parasitol. 2007 Feb;151(2):193-204.                                                                                                                   | 9           |
| Tb927.6.520;<br>Tb927.6.510;<br>Tb927.6.480;<br>Tb927.6.450;<br>Tb10.6k15.0030;<br>Tb10.6k15.0020 | PROCYCLINS                  | PROC     | Northern; qPCR                           | Roditi et al. Nature. 1987 Jan 15-21;325(6101):272-4. Urwyler et al. PLoS Pathog. 2005 Nov;1(3):e22. Epub 2005 Nov 4                                                               | 27          |
