# Supplementary material for: Spliced Leader Trapping Reveals Widespread Alternative Splicing Patterns in the Highly Dynamic Transcriptome of Trypanosoma brucei
Source: PubMed Central journal article supplement (PMC2916883; doi:10.1371/journal.ppat.1001037), 2010-08-05
Supplement: ppat.1001037.s015.pdf [file ppat.1001037.s015.pdf]

Table S2: Robustly regulated transcripts

| <b>ID</b>    | <b>Long slender/<br/>procyclics</b> | <b>Product</b>                                                                                                         | <b>EC</b>   |
|--------------|-------------------------------------|------------------------------------------------------------------------------------------------------------------------|-------------|
| Tb927.2.1700 | up                                  | hypothetical protein, conserved                                                                                        |             |
| Tb927.2.1920 | up                                  | expression site-associated gene (ESAG) protein, putative,expression site-associated gene 5 (ESAG5) protein, putative   |             |
| Tb927.2.2020 | up                                  | expression site-associated gene (ESAG) protein, putative,expression site-associated gene 3 (ESAG3) protein, putative   |             |
| Tb927.2.2060 | up                                  | variant surface glycoprotein (VSG)-related, putative                                                                   |             |
| Tb927.2.2070 | up                                  | hypothetical protein                                                                                                   |             |
| Tb927.2.2120 | up                                  | protein kinase, putative,NIMA/Nek Serine/threonine-protein kinase family, putative                                     |             |
| Tb927.2.3270 | up                                  | 65 kDa invariant surface glycoprotein                                                                                  |             |
| Tb927.2.3300 | up                                  | 65 kDa invariant surface glycoprotein                                                                                  |             |
| Tb927.2.3320 | up                                  | 65 kDa invariant surface glycoprotein                                                                                  |             |
| Tb927.2.3340 | up                                  | hypothetical protein                                                                                                   |             |
| Tb927.2.4670 | up                                  | hypothetical protein, conserved                                                                                        |             |
| Tb927.2.6000 | up                                  | glycosylphosphatidylinositol-specific phospholipase C,VSG lipase                                                       | EC:4.6.1.14 |
| Tb927.2.6180 | up                                  | iron/ascorbate oxidoreductase family protein, putative                                                                 |             |
| Tb927.2.6200 | up                                  | adenosine transporter 2, putative                                                                                      |             |
| Tb927.2.6230 | up                                  | iron/ascorbate oxidoreductase family protein, putative                                                                 |             |
| Tb927.2.6240 | up                                  | adenosine transporter 2                                                                                                |             |
| Tb927.2.6280 | up                                  | adenosine transporter 2, putative                                                                                      |             |
| Tb927.2.6310 | up                                  | iron/ascorbate oxidoreductase family protein, putative                                                                 |             |
| Tb927.2.6320 | up                                  | adenosine transporter 2, putative                                                                                      |             |
| Tb927.3.560  | up                                  | expression site-associated gene (ESAG) protein, putative,expression site-associated gene 11 (ESAG11) protein, putative |             |
| Tb927.3.570  | up                                  | expression site-associated gene (ESAG) protein, putative,expression site-associated gene 2 (ESAG2) protein, putative   |             |
| Tb927.3.580  | up                                  | leucine-rich repeat protein (LRRP), putative                                                                           |             |
| Tb927.3.600  | up                                  | hypothetical protein                                                                                                   |             |
| Tb927.3.1470 | up                                  | variant surface glycoprotein (VSG)-related, putative                                                                   |             |
| Tb927.3.1480 | up                                  | hypothetical protein, conserved                                                                                        |             |
| Tb927.3.1490 | up                                  | leucine-rich repeat protein (LRRP), putative                                                                           |             |
| Tb927.3.1500 | up                                  | variant surface glycoprotein (VSG)-related, putative                                                                   |             |
| Tb927.3.1510 | up                                  | variant surface glycoprotein (VSG)-related, putative                                                                   |             |
| Tb927.3.1660 | up                                  | hypothetical protein, conserved                                                                                        |             |
| Tb927.3.2510 | up                                  | expression site-associated gene (ESAG) protein, putative,expression site-associated gene 2 (ESAG2) protein, putative   |             |

Table S2: Robustly regulated transcripts

|              |    |                                                                                                                      |             |
|--------------|----|----------------------------------------------------------------------------------------------------------------------|-------------|
| Tb927.3.2540 | up | variant surface glycoprotein (VSG)-related, putative                                                                 |             |
| Tb927.3.2590 | up | hypothetical protein                                                                                                 |             |
| Tb927.3.2610 | up | hypothetical protein, conserved                                                                                      |             |
| Tb927.3.3380 | up | TFIIF-stimulated CTD phosphatase, putative                                                                           |             |
| Tb927.3.3870 | up | lipase domain protein, putative                                                                                      |             |
| Tb927.3.4180 | up | hypothetical protein                                                                                                 |             |
| Tb927.3.4230 | up | subtilisin-like serine peptidase,serine peptidase, clan SB, family S8-like protein                                   |             |
| Tb927.3.5080 | up | hypothetical protein, conserved                                                                                      |             |
| Tb927.3.5660 | up | UDP-Gal or UDP-GlcNAc-dependent glycosyltransferase, putative                                                        |             |
| Tb927.3.5670 | up | hypothetical protein                                                                                                 |             |
| Tb927.3.5680 | up | variant surface glycoprotein (VSG)-related, putative                                                                 |             |
| Tb927.3.5690 | up | hypothetical protein, conserved                                                                                      |             |
| Tb927.4.500  | up | hypothetical protein, conserved                                                                                      |             |
| Tb927.4.710  | up | hypothetical protein, conserved                                                                                      |             |
| Tb927.4.810  | up | expression site-associated gene (ESAG) protein, putative,expression site-associated gene 5 (ESAG5) protein, putative |             |
| Tb927.4.1230 | up | hypothetical protein                                                                                                 |             |
| Tb927.4.1640 | up | UDP-galactose transporter, putative                                                                                  |             |
| Tb927.4.2380 | up | sarcoplasmic reticulum glycoprotein, putative                                                                        |             |
| Tb927.4.2760 | up | hypothetical protein, conserved                                                                                      |             |
| Tb927.4.3980 | up | chaperone protein DNAJ, putative                                                                                     |             |
| Tb927.4.4020 | up | amino acid transporter, putative                                                                                     |             |
| Tb927.4.4410 | up | receptor-type adenylate cyclase GRESAG 4, putative                                                                   | EC:4.6.1.1  |
| Tb927.4.4430 | up | receptor-type adenylate cyclase GRESAG 4, putative                                                                   | EC:4.6.1.1  |
| Tb927.4.4440 | up | receptor-type adenylate cyclase GRESAG 4, putative                                                                   | EC:4.6.1.1  |
| Tb927.4.4460 | up | receptor-type adenylate cyclase GRESAG 4, putative,receptor-type adenylate cyclase GRESAG 4.4B                       | EC:4.6.1.1  |
| Tb927.4.4580 | up | hypothetical protein, conserved                                                                                      |             |
| Tb927.4.4900 | up | hypothetical protein                                                                                                 |             |
| Tb927.4.5310 | up | serine/threonine-protein kinase A, putative,protein kinase, putative                                                 | EC:2.7.1.37 |
| Tb927.5.130  | up | variant surface glycoprotein (VSG)-related, putative                                                                 |             |
| Tb927.5.140  | up | hypothetical protein, conserved                                                                                      |             |
| Tb927.5.310  | up | hypothetical protein                                                                                                 |             |
| Tb927.5.350  | up | 75 kDa invariant surface glycoprotein, putative                                                                      |             |
| Tb927.5.370  | up | 75 kDa invariant surface glycoprotein, putative                                                                      |             |
| Tb927.5.390  | up | 75 kDa invariant surface glycoprotein, putative                                                                      |             |
| Tb927.5.400  | up | 75 kDa invariant surface glycoprotein, putative                                                                      |             |

Table S2: Robustly regulated transcripts

|              |    |                                                                                                                      |             |
|--------------|----|----------------------------------------------------------------------------------------------------------------------|-------------|
| Tb927.5.610  | up | acidic phosphatase, putative                                                                                         |             |
| Tb927.5.630  | up | acidic phosphatase, putative                                                                                         |             |
| Tb927.5.1380 | up | hypothetical protein                                                                                                 |             |
| Tb927.5.1390 | up | 64 kDa invariant surface glycoprotein                                                                                |             |
| Tb927.5.1410 | up | 64 kDa invariant surface glycoprotein                                                                                |             |
| Tb927.5.1430 | up | 64 kDa invariant surface glycoprotein                                                                                |             |
| Tb927.5.1440 | up | hypothetical protein                                                                                                 |             |
| Tb927.5.1970 | up | hypothetical protein                                                                                                 |             |
| Tb927.5.1990 | up | hypothetical protein, conserved                                                                                      |             |
| Tb927.5.2000 | up | hypothetical protein                                                                                                 |             |
| Tb927.5.2010 | up | hypothetical protein                                                                                                 |             |
| Tb927.5.3220 | up | signal peptidase type I, putative,serine peptidase, Clan SF, Family S26A                                             |             |
| Tb927.5.3600 | up | ATP-dependent DEAD/H RNA helicase, putative                                                                          |             |
| Tb927.5.3660 | up | hypothetical protein, conserved                                                                                      |             |
| Tb927.5.4010 | up | hypothetical protein                                                                                                 |             |
| Tb927.5.4600 | up | expression site-associated gene (ESAG) protein, putative,expression site-associated gene 3 (ESAG3) protein, putative |             |
| Tb927.5.4620 | up | expression site-associated gene (ESAG) protein, putative,expression site-associated gene 9 (ESAG9) protein, putative |             |
| Tb927.5.4630 | up | expression site-associated gene (ESAG) protein, putative,expression site-associated gene 1 (ESAG1) protein, putative |             |
| Tb927.6.350  | up | hypothetical protein, conserved                                                                                      |             |
| Tb927.6.440  | up | haptoglobin-hemoglobin receptor                                                                                      |             |
| Tb927.6.560  | up | cysteine peptidase C (CPC),CPC cysteine peptidase, Clan CA, family C1, Cathepsin B-like                              | EC:3.4.22.2 |
| Tb927.6.930  | up | metacaspase MCA3,cysteine peptidase, Clan CD, family C13, putative                                                   |             |
| Tb06.3A7.960 | up | hypothetical protein                                                                                                 |             |
| Tb927.6.1310 | up | hypothetical protein, conserved                                                                                      |             |
| Tb927.6.1350 | up | hypothetical protein, conserved                                                                                      |             |
| Tb927.6.1460 | up | cyclin 3,mitotic cyclin, putative                                                                                    |             |
| Tb927.6.3000 | up | fatty acid desaturase, putative,sphingolipid delta 4 desaturase, putative                                            |             |
| Tb927.6.3120 | up | chaperone protein DNAJ, putative                                                                                     |             |
| Tb927.6.3480 | up | RNA-binding protein, putative                                                                                        |             |
| Tb927.6.3640 | up | hypothetical protein, conserved                                                                                      |             |
| Tb927.6.5000 | up | hypothetical protein, conserved                                                                                      |             |
| Tb927.7.180  | up | hypothetical protein                                                                                                 |             |
| Tb927.7.300  | up | UDP-Gal or UDP-GlcNAc-dependent glycosyltransferase, putative                                                        |             |
| Tb927.7.470  | up | hypothetical protein                                                                                                 |             |
| Tb927.7.1420 | up | hypothetical protein, conserved                                                                                      |             |
| Tb927.7.3250 | up | expression site-associated gene (ESAG) protein, putative,expression site-associated gene 6 (ESAG6) protein, putative |             |

Table S2: Robustly regulated transcripts

|              |    |                                                                                                                      |            |
|--------------|----|----------------------------------------------------------------------------------------------------------------------|------------|
| Tb927.7.3260 | up | expression site-associated gene (ESAG) protein, putative,expression site-associated gene 7 (ESAG7) protein, putative |            |
| Tb927.7.3720 | up | hypothetical protein                                                                                                 |            |
| Tb927.7.3730 | up | RNA-binding protein, putative                                                                                        |            |
| Tb927.7.4110 | up | kinesin, putative                                                                                                    |            |
| Tb927.7.4230 | up | hypothetical protein, conserved                                                                                      |            |
| Tb927.7.4260 | up | hypothetical protein, conserved                                                                                      |            |
| Tb927.7.4500 | up | hypothetical protein, conserved                                                                                      |            |
| Tb927.7.4650 | up | SNF2 DNA repair protein, putative                                                                                    |            |
| Tb927.7.4690 | up | hypothetical protein                                                                                                 |            |
| Tb927.7.5830 | up | hypothetical protein, conserved                                                                                      |            |
| Tb927.7.5890 | up | hypothetical protein, conserved                                                                                      |            |
| Tb927.7.6570 | up | hypothetical protein, conserved                                                                                      |            |
| Tb927.7.6600 | up | hypothetical protein, conserved                                                                                      |            |
| Tb927.7.6860 | up | expression site-associated gene (ESAG) protein, putative,expression site-associated gene 5 (ESAG5) protein, putative |            |
| Tb927.7.7510 | up | hypothetical protein                                                                                                 |            |
| Tb927.7.7520 | up | receptor-type adenylate cyclase GRESAG 4, putative                                                                   | EC:4.6.1.1 |
| Tb927.7.7530 | up | receptor-type adenylate cyclase GRESAG 4, putative                                                                   | EC:4.6.1.1 |
| Tb927.8.1200 | up | vacuolar-type Ca <sup>2+</sup> -ATPase 2                                                                             | EC:3.6.3.- |
| Tb927.8.2070 | up | hypothetical protein, conserved                                                                                      |            |
| Tb927.8.2080 | up | hypothetical protein, conserved                                                                                      |            |
| Tb927.8.2780 | up | RNA-binding protein RBP10, putative                                                                                  |            |
| Tb927.8.3390 | up | hypothetical protein, conserved                                                                                      |            |
| Tb927.8.3720 | up | hypothetical protein, conserved                                                                                      |            |
| Tb927.8.3730 | up | hypothetical protein, conserved                                                                                      |            |
| Tb927.8.4060 | up | flagellum-adhesion glycoprotein, putative                                                                            |            |
| Tb927.8.4340 | up | hypothetical protein, conserved                                                                                      |            |
| Tb927.8.5050 | up | hypothetical protein, conserved                                                                                      |            |
| Tb927.8.5140 | up | hypothetical protein, conserved                                                                                      |            |
| Tb927.8.5870 | up | hypothetical protein, conserved                                                                                      |            |
| Tb927.8.5910 | up | hypothetical protein                                                                                                 |            |
| Tb927.8.6710 | up | hypothetical protein, conserved                                                                                      |            |
| Tb927.8.6720 | up | hypothetical protein, conserved                                                                                      |            |
| Tb927.8.6730 | up | hypothetical protein, conserved                                                                                      |            |
| Tb927.8.7300 | up | variant surface glycoprotein (VSG)-related, putative                                                                 |            |
| Tb927.8.7310 | up | hypothetical protein                                                                                                 |            |
| Tb927.8.7330 | up | hypothetical protein                                                                                                 |            |
| Tb927.8.7710 | up | hypothetical protein, conserved                                                                                      |            |
| Tb927.8.7760 | up | hypothetical protein, conserved                                                                                      |            |
| Tb927.8.7780 | up | hypothetical protein, conserved                                                                                      |            |
| Tb927.8.7820 | up | hypothetical protein, conserved                                                                                      |            |
| Tb927.8.7920 | up | receptor-type adenylate cyclase GRESAG 4, putative                                                                   | EC:4.6.1.1 |
| Tb927.8.7970 | up | hypothetical protein                                                                                                 |            |
| Tb927.8.8000 | up | hypothetical protein, conserved                                                                                      |            |
| Tb927.8.8270 | up | hypothetical protein, conserved                                                                                      |            |
| Tb927.8.8320 | up | hypothetical protein, conserved                                                                                      |            |

Table S2: Robustly regulated transcripts

|               |    |                                                                                                      |            |
|---------------|----|------------------------------------------------------------------------------------------------------|------------|
| Tb927.8.8330  | up | calpain, putative,cysteine peptidase, putative                                                       |            |
| Tb09.142.0310 | up | expression site-associated gene (ESAG) protein,expression site-associated gene 1 (ESAG1) protein     |            |
| Tb09.142.0320 | up | hypothetical protein                                                                                 |            |
| Tb09.160.0280 | up | variant surface glycoprotein (VSG, atypical), putative                                               |            |
| Tb09.160.1490 | up | hypothetical protein, conserved                                                                      |            |
| Tb09.160.3090 | up | heat shock protein, putative,HSP70-like protein                                                      |            |
| Tb09.160.3740 | up | hypothetical protein, conserved                                                                      |            |
| Tb09.160.4570 | up | arginine kinase                                                                                      | EC:2.7.3.3 |
| Tb09.160.4760 | up | hypothetical protein                                                                                 |            |
| Tb09.160.5350 | up | variant surface glycoprotein (VSG)-related, putative                                                 |            |
| Tb09.160.5380 | up | expression site-associated gene 11 (ESAG11) protein, putative                                        |            |
| Tb09.160.5390 | up | expression site-associated gene 2 (ESAG2) protein, putative                                          |            |
| Tb09.160.5400 | up | expression site-associated gene 9 (ESAG9) protein, putative                                          |            |
| Tb09.v1.0290  | up | variant surface glycoprotein (VSG)-related, putative                                                 |            |
| Tb09.v1.0300  | up | variant surface glycoprotein (VSG)-related, putative                                                 |            |
| Tb09.211.0450 | up | hypothetical protein, conserved                                                                      |            |
| Tb09.211.1010 | up | phosphatidylcholine:ceramide cholinephosphotransferase 2, putative                                   | EC:2.7.-.- |
| Tb09.211.1020 | up | phosphatidylcholine:ceramide cholinephosphotransferase 2, putative                                   | EC:2.7.-.- |
| Tb09.v1.0650  | up | hypothetical protein, conserved                                                                      |            |
| Tb09.211.3955 | up | hypothetical protein, conserved,predicted heat shock factor binding protein                          |            |
| Tb09.244.2330 | up | variant surface glycoprotein (VSG)-related, putative                                                 |            |
| Tb09.244.2190 | up | hypothetical protein, conserved                                                                      |            |
| Tb09.244.2180 | up | retrotransposon hot spot (RHS) protein, putative,retrotransposon hot spot protein 3 (RHS3), putative |            |
| Tb09.v4.0010  | up | variant surface glycoprotein (VSG), putative,chrIX additional, unordered contigs                     |            |
| Tb09.v4.0012  | up | variant surface glycoprotein (VSG), putative,chrIX additional, unordered contigs                     |            |
| Tb09.v4.0013  | up | retrotransposon hot spot (RHS) protein, putative,chrIX additional, unordered contigs                 |            |

Table S2: Robustly regulated transcripts

|                |    |                                                                                                                                          |             |
|----------------|----|------------------------------------------------------------------------------------------------------------------------------------------|-------------|
| Tb09.v4.0014   | up | hypothetical protein,chrIX additional, unordered contigs                                                                                 |             |
| Tb09.v4.0065   | up | expression site-associated gene 1 (ESAG 1), putative,chrIX additional, unordered contigs                                                 |             |
| Tb10.70.7150   | up | hypothetical protein, conserved                                                                                                          |             |
| Tb10.70.7090   | up | serine carboxypeptidase III precursor, putative,serine carboxypeptidase (CBP1) precursor, putative,serine peptidase, Clan SC, Family S10 | EC:3.4.16.5 |
| Tb10.70.6130   | up | hypothetical protein                                                                                                                     |             |
| Tb10.70.6110   | up | hypothetical protein                                                                                                                     |             |
| Tb10.70.5820   | up | hexokinase                                                                                                                               | EC:2.7.1.1  |
| Tb10.70.5400   | up | hypothetical protein, conserved                                                                                                          |             |
| Tb10.70.5340   | up | protein kinase, putative,casein kinase I, putative                                                                                       |             |
| Tb10.70.5290   | up | major surface protease gp63, putative,surface protease homologue                                                                         |             |
| Tb10.70.5250   | up | metacaspase MCA4,cysteine peptidase, Clan CD, family C13, putative                                                                       |             |
| Tb10.70.5060   | up | hypothetical protein, conserved                                                                                                          |             |
| Tb10.70.3710   | up | aspartate aminotransferase                                                                                                               | EC:2.6.1.1  |
| Tb10.70.3610   | up | hypothetical protein, conserved                                                                                                          |             |
| Tb10.70.3560   | up | hypothetical protein, conserved,predicted RING finger protein                                                                            |             |
| Tb10.70.2990   | up | hypothetical protein, conserved                                                                                                          |             |
| Tb10.70.2850   | up | hypothetical protein                                                                                                                     |             |
| Tb10.70.2840   | up | hypothetical protein                                                                                                                     |             |
| Tb10.70.2420   | up | GPI inositol deacylase precursor                                                                                                         |             |
| Tb10.70.2020   | up | hypothetical protein, conserved,zinc finger protein family member, putative                                                              |             |
| Tb10.70.1850   | up | hypothetical protein, conserved,zinc finger protein family member, putative                                                              |             |
| Tb10.70.1310   | up | procyclin-associated gene 1 (PAG1) protein, putative                                                                                     |             |
| Tb10.70.1300   | up | procyclin-associated gene 2 (PAG2) protein, putative                                                                                     |             |
| Tb10.70.1290   | up | hypothetical protein, conserved                                                                                                          |             |
| Tb10.70.1280   | up | hypothetical protein, conserved                                                                                                          |             |
| Tb10.70.1130   | up | hypothetical protein, conserved                                                                                                          |             |
| Tb10.70.0040   | up | hypothetical protein, conserved                                                                                                          |             |
| Tb10.6k15.3640 | up | alternative oxidase                                                                                                                      |             |
| Tb10.6k15.1970 | up | hypothetical protein, conserved                                                                                                          |             |
| Tb10.6k15.0940 | up | hypothetical protein                                                                                                                     |             |
| Tb10.6k15.0920 | up | expression site-associated gene (ESAG) protein, putative,expression site-associated gene 3 (ESAG3) protein, putative                     |             |
| Tb10.6k15.0900 | up | expression site-associated gene 3 (ESAG3)-like protein                                                                                   |             |

Table S2: Robustly regulated transcripts

|                |    |                                                                                                                                           |             |
|----------------|----|-------------------------------------------------------------------------------------------------------------------------------------------|-------------|
| Tb10.6k15.0890 | up | expression site-associated gene (ESAG) protein, putative,expression site-associated gene 3 (ESAG3) protein, putative                      |             |
| Tb10.6k15.0880 | up | hypothetical protein                                                                                                                      |             |
| Tb10.389.1640  | up | RNA-binding protein, putative                                                                                                             |             |
| Tb10.389.0740  | up | hypothetical protein, conserved,zinc finger protein family member, putative                                                               |             |
| Tb10.389.0720  | up | hypothetical protein, conserved                                                                                                           |             |
| Tb10.61.2680   | up | pyruvate kinase 1                                                                                                                         | EC:2.7.1.40 |
| Tb10.61.1750   | up | C-terminal motor kinesin, putative                                                                                                        |             |
| Tb10.61.1710   | up | sarcoplasmic reticulum glycoprotein, putative,sarcalumenin precursor, putative                                                            |             |
| Tb10.61.0380   | up | glycerol uptake protein, putative                                                                                                         |             |
| Tb10.v4.0213   | up | expression site-associated gene (ESAG), putative,expression site-associated protein 1 (ESAG1), putative,chrX additional, unordered contig |             |
| Tb10.v4.0217   | up | hypothetical protein,chrX additional, unordered contig                                                                                    |             |
| Tb11.47.0026   | up | hypothetical protein, conserved                                                                                                           |             |
| Tb11.47.0021   | up | hypothetical protein, conserved                                                                                                           |             |
| Tb11.47.0014   | up | hypothetical protein, conserved                                                                                                           |             |
| Tb11.47.0001   | up | 65 kDa invariant surface glycoprotein-like protein                                                                                        |             |
| Tb11.02.0730   | up | metacaspase,cysteine peptidase, Clan CD, family C13                                                                                       |             |
| Tb11.02.1564   | up | leucine-rich repeat protein (LRRP), putative                                                                                              |             |
| Tb11.02.1565   | up | hypothetical protein                                                                                                                      |             |
| Tb11.02.1566   | up | variant surface glycoprotein (VSG)-related, putative                                                                                      |             |
| Tb11.02.1580   | up | leucine-rich repeat protein (LRRP), putative                                                                                              |             |
| Tb11.02.1640   | up | kinetoplastid-specific dual specificity phosphatase, putative                                                                             |             |
| Tb11.02.3950   | up | ABC transporter, putative                                                                                                                 |             |
| Tb11.02.4750   | up | hypothetical protein, conserved                                                                                                           |             |
| Tb11.02.5310   | up | major surface protease A, putative,Gp63 major surface glycoprotein-like protein,MSP-A, putative                                           |             |
| Tb11.02.5540   | up | hypothetical protein, conserved                                                                                                           |             |
| Tb11.02.5610   | up | Gp63-1 surface protease homolog, putative                                                                                                 |             |
| Tb11.01.0220   | up | hypothetical protein, conserved                                                                                                           |             |
| Tb11.01.0210   | up | hypothetical protein                                                                                                                      |             |
| Tb11.01.0120   | up | haloacid dehalogenase-like hydrolase, putative                                                                                            |             |
| Tb11.01.0090   | up | hypothetical protein, conserved,zinc finger protein family member, putative                                                               |             |
| Tb11.12.0008   | up | hypothetical protein, conserved                                                                                                           |             |
| Tb11.12.0016   | up | glutathionylspermidine synthetase, putative                                                                                               |             |
| Tb11.01.2460   | up | hypothetical protein, conserved                                                                                                           |             |
| Tb11.01.2580   | up | hypothetical protein, conserved                                                                                                           |             |

Table S2: Robustly regulated transcripts

|              |    |                                                                                                                        |             |
|--------------|----|------------------------------------------------------------------------------------------------------------------------|-------------|
| Tb11.01.3390 | up | DNA topoisomerase II, putative                                                                                         | EC:5.99.1.3 |
| Tb11.01.3580 | up | hypothetical protein, conserved                                                                                        |             |
| Tb11.01.3940 | up | RNA-binding protein, putative                                                                                          |             |
| Tb11.v4.0002 | up | hypothetical protein                                                                                                   |             |
| Tb11.01.5210 | up | hypothetical protein, conserved                                                                                        |             |
| Tb11.01.6010 | up | hypothetical protein, conserved                                                                                        |             |
| Tb11.01.6210 | up | procyclin-associated gene 2-like protein, putative                                                                     |             |
| Tb11.01.6220 | up | procyclin-associated gene 4 (PAG4) protein, putative                                                                   |             |
| Tb11.01.6230 | up | expression site-associated gene 2 (ESAG2) protein, putative                                                            |             |
| Tb11.01.6240 | up | expression site-associated gene (ESAG) protein, putative,expression site-associated gene 2 (ESAG2) protein, putative   |             |
| Tb11.01.6250 | up | expression site-associated gene (ESAG) protein, putative,expression site-associated gene 11 (ESAG11) protein, putative |             |
| Tb11.01.7530 | up | hypothetical protein, conserved                                                                                        |             |
| Tb11.17.0002 | up | expression site-associated gene (ESAG) protein, putative,expression site-associated gene 1 (ESAG1) protein, putative   |             |
| Tb927.1.700  | up | phosphoglycerate kinase                                                                                                | EC:2.7.2.3  |
| Tb927.1.1500 | up | hypothetical protein, conserved                                                                                        |             |
| Tb927.1.2040 | up | expression site-associated gene 2 (ESAG2) protein, putative                                                            |             |
| Tb927.1.3550 | up | hypothetical protein                                                                                                   |             |
| Tb927.1.4490 | up | acetyltransferase, putative                                                                                            |             |
| Tb927.1.4600 | up | hypothetical protein, conserved                                                                                        |             |
| Tb927.1.4650 | up | hypothetical protein, conserved                                                                                        |             |
| Tb927.1.4870 | up | expression site-associated gene (ESAG) protein, putative,expression site-associated gene 1 (ESAG1) protein, putative   |             |
| Tb927.1.4890 | up | expression site-associated gene 2 (ESAG2) protein, putative                                                            |             |
| Tb927.1.4900 | up | expression site-associated gene 11 (ESAG11) protein, putative                                                          |             |
| Tb927.1.4910 | up | expression site-associated gene (ESAG) protein, putative,expression site-associated gene 1 (ESAG1) protein, putative   |             |
| Tb927.1.5060 | up | variant surface glycoprotein (VSG)-related, putative                                                                   |             |
| Tb927.1.5080 | up | expression site-associated gene (ESAG) protein, putative,expression site-associated gene 9 (ESAG9) protein, putative   |             |
| Tb927.1.5100 | up | expression site-associated gene 2 (ESAG2) protein, putative                                                            |             |
| Tb927.1.5110 | up | expression site-associated gene 11 (ESAG11) protein, putative                                                          |             |
| Tb927.1.5120 | up | expression site-associated gene (ESAG) protein, putative,expression site-associated gene 1 (ESAG1) protein, putative   |             |



Table S2: Robustly regulated transcripts

|              |      |                                                                                                                              |             |
|--------------|------|------------------------------------------------------------------------------------------------------------------------------|-------------|
| Tb927.1.5170 | up   | variant surface glycoprotein (VSG)-related, putative                                                                         |             |
| Tb927.1.5180 | up   | hypothetical protein                                                                                                         |             |
| Tb927.1.5200 | up   | expression site-associated gene (ESAG) protein, putative, expression site-associated gene 1 (ESAG1) protein, putative        |             |
| Tb927.2.2140 | down | hypothetical protein, conserved                                                                                              |             |
| Tb927.2.2510 | down | hypothetical protein, conserved                                                                                              |             |
| Tb927.2.3610 | down | hypothetical protein, conserved                                                                                              |             |
| Tb927.2.4210 | down | glycosomal phosphoenolpyruvate carboxykinase, glycosomal protein P60                                                         | EC:4.1.1.49 |
| Tb927.2.5700 | down | hypothetical protein                                                                                                         |             |
| Tb927.3.940  | down | hypothetical protein, conserved                                                                                              |             |
| Tb927.3.1380 | down | ATP synthase beta chain, mitochondrial precursor, ATP synthase F1, beta subunit                                              | EC:3.6.3.14 |
| Tb927.3.2150 | down | protein phosphatase 2C, putative                                                                                             |             |
| Tb927.3.2180 | down | hypothetical protein, conserved                                                                                              |             |
| Tb927.3.2230 | down | succinyl-CoA synthetase alpha subunit, putative                                                                              | EC:6.2.1.4  |
| Tb927.3.2650 | down | cytochrome c oxidase copper chaperone, putative                                                                              |             |
| Tb927.3.2880 | down | hypothetical protein, conserved                                                                                              |             |
| Tb927.3.3630 | down | elongation factor Ts, putative                                                                                               |             |
| Tb927.3.4020 | down | phosphatidylinositol 4-kinase alpha, putative                                                                                | EC:2.7.1.67 |
| Tb927.3.4500 | down | fumarate hydratase, putative                                                                                                 | EC:4.2.1.2  |
| Tb927.3.4650 | down | C-8 sterol isomerase, putative                                                                                               | EC:5.3.3.5  |
| Tb927.3.5780 | down | hypothetical protein                                                                                                         |             |
| Tb927.4.720  | down | hypothetical protein, conserved                                                                                              |             |
| Tb927.4.1360 | down | hypothetical protein, conserved                                                                                              |             |
| Tb927.4.3950 | down | cytoskeleton-associated protein CAP5.5, putative, cysteine peptidase, Clan CA, family C2, putative                           |             |
| Tb927.4.4620 | down | cytochrome oxidase subunit VIII                                                                                              |             |
| Tb927.4.4730 | down | amino acid transporter, putative                                                                                             |             |
| Tb927.4.4990 | down | ubiquinol-cytochrome C reductase, putative                                                                                   | EC:1.10.2.2 |
| Tb927.4.5340 | down | hypothetical protein, conserved                                                                                              |             |
| Tb927.5.440  | down | hypothetical protein, conserved                                                                                              |             |
| Tb927.5.510  | down | hypothetical protein, conserved                                                                                              |             |
| Tb927.5.930  | down | NADH-dependent fumarate reductase                                                                                            | EC:1.3.1.6  |
| Tb927.5.1060 | down | mitochondrial processing peptidase, beta subunit, putative, metallo-peptidase, Clan ME, Family M16                           | EC:1.10.2.2 |
| Tb927.5.1150 | down | pre-mRNA splicing factor ATP-dependent RNA helicase, putative, pre-mRNA splicing factor ATP-dependent RNA helicase, putative |             |
| Tb927.5.2160 | down | hypothetical protein, conserved                                                                                              |             |
| Tb927.5.2260 | down | hypothetical protein, conserved                                                                                              |             |
| Tb927.5.2560 | down | hypothetical protein, conserved                                                                                              |             |
| Tb927.5.2930 | down | hypothetical protein, conserved                                                                                              |             |
| Tb927.5.3040 | down | hypothetical protein, conserved                                                                                              |             |
| Tb927.5.3090 | down | hypothetical protein, conserved                                                                                              |             |

Table S2: Robustly regulated transcripts

|              |      |                                                                                                                            |             |
|--------------|------|----------------------------------------------------------------------------------------------------------------------------|-------------|
| Tb927.5.3340 | down | hypothetical protein, conserved                                                                                            |             |
| Tb927.5.3350 | down | iron superoxide dismutase, putative                                                                                        | EC:1.15.1.1 |
| Tb927.5.3400 | down | calcium-translocating P-type ATPase,calcium pump                                                                           | EC:3.6.3.6  |
| Tb927.5.4020 | down | hypothetical protein                                                                                                       |             |
| Tb927.6.510  | down | GPEET2 procyclin precursor,PARP A-alpha,procyclin A-alpha,procyclic form specific polypeptide A-alpha precursor            |             |
| Tb927.6.520  | down | EP3-2 procyclin,PARP A-beta,surface protein EP3-3 procyclin precursor,procyclic form specific polypeptide A-beta precursor |             |
| Tb927.6.2070 | down | hypothetical protein, conserved                                                                                            |             |
| Tb927.6.2170 | down | co-chaperone GrpE, putative                                                                                                |             |
| Tb927.6.2490 | down | hypothetical protein, conserved                                                                                            |             |
| Tb927.6.4130 | down | hypothetical protein, conserved                                                                                            |             |
| Tb927.6.4540 | down | 3-hydroxy-3-methylglutaryl-CoA reductase, putative                                                                         | EC:1.1.1.34 |
| Tb927.6.4570 | down | hypothetical protein, conserved                                                                                            |             |
| Tb927.6.4990 | down | ATP synthase, epsilon chain, putative                                                                                      | EC:3.6.3.-  |
| Tb927.7.210  | down | proline dehydrogenase                                                                                                      | EC:1.5.99.8 |
| Tb927.7.840  | down | hypothetical protein, conserved                                                                                            |             |
| Tb927.7.1470 | down | ATPase subunit 9, putative                                                                                                 | EC:3.6.3.14 |
| Tb927.7.2570 | down | hypothetical protein, conserved                                                                                            |             |
| Tb927.7.2640 | down | hypothetical protein, conserved                                                                                            |             |
| Tb927.7.2680 | down | hypothetical protein, conserved,zinc finger protein family member, putative                                                |             |
| Tb927.7.2700 | down | NADH-cytochrome b5 reductase, putative                                                                                     | EC:1.6.2.2  |
| Tb927.7.3020 | down | hypothetical protein, conserved                                                                                            |             |
| Tb927.7.3050 | down | hypothetical protein, conserved                                                                                            |             |
| Tb927.7.3100 | down | hypothetical protein, conserved                                                                                            |             |
| Tb927.7.3280 | down | translation initiation factor IF-2, putative                                                                               |             |
| Tb927.7.4070 | down | calpain-like cysteine peptidase, putative,cysteine peptidase, Clan CA, family C2, putative                                 |             |
| Tb927.7.4970 | down | glutamine synthetase, putative                                                                                             | EC:6.3.1.2  |
| Tb927.7.6030 | down | hypothetical protein                                                                                                       |             |
| Tb927.7.6850 | down | trans-sialidase                                                                                                            | EC:3.2.1.18 |
| Tb927.7.7090 | down | hypothetical protein, conserved                                                                                            |             |
| Tb927.7.7420 | down | ATP synthase alpha chain, mitochondrial precursor,ATP synthase F1, alpha subunit                                           |             |
| Tb927.7.7470 | down | receptor-type adenylate cyclase GRESAG 4, putative                                                                         | EC:4.6.1.1  |
| Tb927.8.1740 | down | hypothetical protein, conserved                                                                                            |             |
| Tb927.8.1790 | down | hypothetical protein, conserved                                                                                            |             |
| Tb927.8.1890 | down | cytochrome c1, heme protein, mitochondrial precursor                                                                       | EC:1.10.2.2 |
| Tb927.8.2540 | down | 3-ketoacyl-CoA thiolase, putative                                                                                          | EC:2.3.1.16 |
| Tb927.8.2770 | down | hypothetical protein, conserved                                                                                            |             |
| Tb927.8.4050 | down | hypothetical protein, conserved                                                                                            |             |
| Tb927.8.4380 | down | hypothetical protein, conserved                                                                                            |             |
| Tb927.8.4630 | down | hypothetical protein, conserved                                                                                            |             |
| Tb927.8.4810 | down | prohibitin                                                                                                                 |             |
| Tb927.8.5950 | down | protein kinase, putative                                                                                                   | EC:2.7.1.-  |

Table S2: Robustly regulated transcripts

|               |      |                                                                                                               |             |
|---------------|------|---------------------------------------------------------------------------------------------------------------|-------------|
| Tb927.8.6110  | down | hypothetical protein, conserved                                                                               |             |
| Tb927.8.6410  | down | short-chain dehydrogenase, putative                                                                           |             |
| Tb927.8.6580  | down | succinate dehydrogenase flavoprotein, putative                                                                |             |
| Tb927.8.6750  | down | translationally controlled tumor protein (TCTP), putative, IgE-dependent histamine-releasing factor, putative |             |
| Tb927.8.7120  | down | farnesyltransferase, putative, squalene synthase, putative                                                    | EC:2.5.1.21 |
| Tb927.8.7290  | down | hypothetical protein, conserved                                                                               |             |
| Tb927.8.7340  | down | trans-sialidase, putative, neuraminidase, putative                                                            |             |
| Tb927.8.7350  | down | trans-sialidase, putative, neuraminidase, putative                                                            |             |
| Tb927.8.7530  | down | 3,2-trans-enoyl-CoA isomerase, mitochondrial precursor, putative                                              | EC:5.3.3.8  |
| Tb927.8.7540  | down | hypothetical protein                                                                                          |             |
| Tb927.8.7730  | down | hypothetical protein, conserved                                                                               |             |
| Tb927.8.8300  | down | amino acid transporter, putative                                                                              |             |
| Tb09.160.0465 | down | hypothetical protein, conserved                                                                               |             |
| Tb09.160.0510 | down | hypothetical protein, conserved                                                                               |             |
| Tb09.160.1100 | down | hypothetical protein, conserved                                                                               |             |
| Tb09.160.1820 | down | cytochrome oxidase subunit V                                                                                  |             |
| Tb09.160.2160 | down | hypothetical protein, conserved                                                                               |             |
| Tb09.160.4950 | down | hypothetical protein, conserved                                                                               |             |
| Tb09.160.5060 | down | hypothetical protein, conserved                                                                               |             |
| Tb09.160.5260 | down | oxidoreductase, putative                                                                                      | EC:1.6.5.5  |
| Tb09.v1.0420  | down | hypothetical protein, conserved                                                                               |             |
| Tb09.211.0040 | down | hypothetical protein, conserved                                                                               |             |
| Tb09.211.1240 | down | hypothetical protein, conserved                                                                               |             |
| Tb09.211.1800 | down | hypothetical protein, conserved                                                                               |             |
| Tb09.211.1940 | down | hypothetical protein, conserved                                                                               |             |
| Tb09.211.3330 | down | cystathione gamma lyase, putative                                                                             | EC:4.4.1.1  |
| Tb09.211.3680 | down | chaperone protein DNAJ, putative                                                                              |             |
| Tb09.211.4070 | down | hypothetical protein                                                                                          |             |
| Tb09.244.2700 | down | hypothetical protein, conserved                                                                               |             |

Table S2: Robustly regulated transcripts

|                |      |                                                                                                       |             |
|----------------|------|-------------------------------------------------------------------------------------------------------|-------------|
| Tb10.100.0070  | down | ATP synthase F1 subunit gamma protein, putative                                                       | EC:3.6.3.14 |
| Tb10.100.0160  | down | cytochrome oxidase subunit VI                                                                         |             |
| Tb10.70.6660   | down | hypoxanthine-guanine phosphoribosyltransferase, putative                                              |             |
| Tb10.70.6470   | down | methionyl-tRNA synthetase, putative                                                                   | EC:6.1.1.10 |
| Tb10.70.6340   | down | ATPase subunit 9, putative                                                                            | EC:3.6.3.14 |
| Tb10.70.5110   | down | mitochondrial malate dehydrogenase                                                                    | EC:1.1.1.37 |
| Tb10.70.4590   | down | hypothetical protein, conserved                                                                       |             |
| Tb10.70.4140   | down | hypothetical protein, conserved                                                                       |             |
| Tb10.70.3010   | down | hypothetical protein, conserved                                                                       |             |
| Tb10.70.2970   | down | hypothetical protein, conserved                                                                       |             |
| Tb10.70.2320   | down | hypothetical protein, conserved                                                                       |             |
| Tb10.70.2155   | down | hypothetical protein, conserved                                                                       |             |
| Tb10.70.0625   | down | hypothetical protein, conserved                                                                       |             |
| Tb10.6k15.3510 | down | cysteine-rich, acidic integral membrane protein precursor                                             |             |
| Tb10.6k15.2510 | down | hypothetical protein, conserved                                                                       |             |
| Tb10.6k15.2180 | down | cytochrome oxidase subunit IX                                                                         |             |
| Tb10.6k15.1350 | down | pteridine transporter, putative                                                                       |             |
| Tb10.6k15.0500 | down | hypothetical protein, conserved                                                                       |             |
| Tb10.6k15.0280 | down | hypothetical protein, conserved                                                                       |             |
| Tb10.6k15.0030 | down | EP2 procyclin                                                                                         |             |
| Tb10.389.1480  | down | cytosolic nonspecific dipeptidase, putative,peptidase (M20/M25/M40 family), putative                  |             |
| Tb10.389.1180  | down | P-type H <sup>+</sup> -ATPase, putative                                                               | EC:3.6.3.6  |
| Tb10.389.0910  | down | 60S ribosomal protein L34, putative                                                                   |             |
| Tb10.389.0770  | down | hypothetical protein, conserved,zinc finger protein family member, putative                           |             |
| Tb10.389.0690  | down | mitochondrial carrier protein, putative,mitochondrial 2-oxoglutarate/malate carrier protein, putative |             |
| Tb10.389.0070  | down | elongation factor TU, putative                                                                        |             |
| Tb10.61.2745   | down | mevalonate diphosphate decarboxylase                                                                  | EC:4.1.1.33 |
| Tb10.61.0980   | down | glycosomal malate dehydrogenase                                                                       | EC:1.1.1.37 |
| Tb10.61.0395   | down | hypothetical protein, conserved                                                                       |             |
| Tb10.61.0370   | down | hypothetical protein, conserved                                                                       |             |
| Tb10.61.0220   | down | hypothetical protein, conserved                                                                       |             |
| Tb10.61.0200   | down | hypothetical protein, conserved                                                                       |             |
| Tb11.47.0022   | down | hypothetical protein, conserved                                                                       |             |

Table S2: Robustly regulated transcripts

|              |      |                                                                                                    |               |
|--------------|------|----------------------------------------------------------------------------------------------------|---------------|
| Tb11.47.0004 | down | 2-oxoglutarate dehydrogenase E1 component, putative                                                |               |
| Tb11.22.0001 | down | hypothetical protein, conserved                                                                    |               |
| Tb11.02.0445 | down | hypothetical protein, conserved                                                                    |               |
| Tb11.02.0580 | down | vesicular protein trafficking mediator, putative                                                   |               |
| Tb11.02.1480 | down | mitochondrial processing peptidase alpha subunit, putative, metallo-peptidase, Clan ME, Family M16 | EC:3.4.99.41  |
| Tb11.02.2310 | down | prostaglandin f synthase                                                                           | EC:1.1.-.-    |
| Tb11.02.2950 | down | ATPase subunit 9, putative                                                                         | EC:3.6.3.14   |
| Tb11.02.3120 | down | malic enzyme, putative                                                                             | EC:1.1.1.38   |
| Tb11.02.3180 | down | hypothetical protein, conserved                                                                    |               |
| Tb11.02.3210 | down | triosephosphate isomerase                                                                          | EC:5.3.1.1    |
| Tb11.02.4080 | down | lanosterol 14-alpha-demethylase, cytochrome P450 51A1                                              | EC:1.14.13.70 |
| Tb11.02.4120 | down | hypothetical protein, conserved                                                                    |               |
| Tb11.02.4150 | down | pyruvate phosphate dikinase                                                                        | EC:2.7.9.1    |
| Tb11.02.4910 | down | acidocalcisomal pyrophosphatase                                                                    |               |
| Tb11.02.5160 | down | hypothetical protein, conserved                                                                    |               |
| Tb11.02.5165 | down | hypothetical protein, conserved                                                                    |               |
| Tb11.02.5400 | down | cystathionine beta-synthase, putative                                                              | EC:4.2.1.22   |
| Tb11.02.5480 | down | hypothetical protein, conserved                                                                    |               |
| Tb11.02.5490 | down | hypothetical protein, conserved                                                                    |               |
| Tb11.02.5590 | down | hypothetical protein, conserved                                                                    |               |
| Tb11.02.5660 | down | hypothetical protein, conserved                                                                    |               |
| Tb11.02.5770 | down | mitochondrial RNA binding protein, RBP16, RNA-binding protein of 16 kDa                            |               |
| Tb11.01.0720 | down | cation transporter, putative                                                                       |               |
| Tb11.01.1480 | down | 60S ribosomal protein L34, putative                                                                |               |
| Tb11.01.6410 | down | phosphomannose isomerase, putative                                                                 | EC:5.3.1.8    |
| Tb11.01.6660 | down | iron superoxide dismutase                                                                          | EC:1.15.1.1   |
| Tb11.01.7170 | down | C-14 sterol reductase, putative                                                                    |               |
| Tb11.01.7880 | down | microtubule-associated protein, corset-associated protein 17                                       |               |
| Tb11.01.8225 | down | hypothetical protein, conserved                                                                    |               |
| Tb11.01.8470 | down | dihydrolipoyl dehydrogenase                                                                        | EC:1.8.1.4    |
| Tb927.1.710  | down | phosphoglycerate kinase                                                                            | EC:2.7.2.3    |
| Tb927.1.2230 | down | calpain-like protein fragment, putative                                                            |               |
| Tb927.1.2260 | down | calpain-like protein fragment, putative                                                            |               |
| Tb927.1.3310 | down | hypothetical protein, conserved                                                                    |               |
