# Supplementary material for: Spliced Leader Trapping Reveals Widespread Alternative Splicing Patterns in the Highly Dynamic Transcriptome of Trypanosoma brucei
Source: PubMed Central journal article supplement (PMC2916883; doi:10.1371/journal.ppat.1001037), 2010-08-05
Supplement: ppat.1001037.s017.pdf [file ppat.1001037.s017.pdf]

Table S4: Correlation of expression profile between SLT and qPCR for 10 selected genes

| <b>ID</b>      | <b>log<sub>2</sub> SLT changes<br/>procylics/long slender</b> | <b>log<sub>2</sub> qPCR changes<br/>procylics/long slender</b> |
|----------------|---------------------------------------------------------------|----------------------------------------------------------------|
| Tb927.7.3730   | -2.77                                                         | -1.77                                                          |
| Tb927.7.4230   | -2.37                                                         | -2.43                                                          |
| Tb10.70.3610   | -3.79                                                         | -2.67                                                          |
| Tb10.61.0370   | 1.15                                                          | 0.50                                                           |
| Tb11.02.5490   | 5.18                                                          | 3.24                                                           |
| Tb11.02.5500   | -0.51                                                         | -0.70                                                          |
| Tb10.389.0080  | 1.36                                                          | -0.88                                                          |
| Tb927.7.4650   | -3.09                                                         | -1.79                                                          |
| Tb927.6.510    | 5.15                                                          | 2.74                                                           |
| Tb10.6k15.3640 | -4.61                                                         | -2.84                                                          |
