# Supplementary material for: Spliced Leader Trapping Reveals Widespread Alternative Splicing Patterns in the Highly Dynamic Transcriptome of Trypanosoma brucei
Source: PubMed Central journal article supplement (PMC2916883; doi:10.1371/journal.ppat.1001037), 2010-08-05
Supplement: ppat.1001037.s018.pdf [file ppat.1001037.s018.pdf]

Table S5: Proteins with N-terminal extensions

| ID            | Position of peptide relative to anotated AUG in nucleotides | Position of peptide relative to anotated AUG in amino acids | Total number of tags | Tags per million (TPM) | Number of tags/splice site | Length of UTRs      | Length of major UTR | TPM of major UTR | Description                                 |
|---------------|-------------------------------------------------------------|-------------------------------------------------------------|----------------------|------------------------|----------------------------|---------------------|---------------------|------------------|---------------------------------------------|
| Tb927.3.5490  | -12                                                         | -4                                                          | 112                  | 96                     | 98,5,9                     | 267,247,110         | 267                 | 98               | flagellar transport protein                 |
| Tb927.5.3170  | -546                                                        | -182                                                        | 97                   | 83                     | 11,12,1,73                 | 1080,1085,1087,1090 | 1090                | 73               | ribose-phosphate pyrophosphokinase          |
| Tb927.7.1550  | -81                                                         | -27                                                         | 38                   | 32                     | 1,34,1,2                   | 438,329,323,232     | 329                 | 34               | terminal uridylyl transferase, KRET2        |
| Tb927.7.3280  | -66                                                         | -22                                                         | 129                  | 110                    | 1,1,123,4                  | 238,240,256,737     | 256                 | 123              | translation initiation factor IF-2 putative |
| Tb927.7.7440  | -39                                                         | -13                                                         | 29                   | 25                     | 3,9,2,15                   | 175,205,1832,1836   | 1836                | 15               | hypothetical protein conserved              |
| Tb09.211.0330 | -177                                                        | -59                                                         | 100                  | 85                     | 2,10,54,34                 | 574,582,593,596     | 593                 | 54               | chaperone protein DNAJ                      |
| Tb10.70.7880  | -69                                                         | -23                                                         | 30                   | 26                     | 25,4,1                     | 469,464,444         | 469                 | 25               | hypothetical protein conserved              |
| Tb10.70.3980  | -63                                                         | -21                                                         | 1                    | 1                      | 1                          | -1266               | -1266               | 1                | hypothetical protein conserved              |
| Tb10.61.0150  | -36                                                         | -12                                                         | 124                  | 106                    | 120,4                      | 449,-185            | 449                 | 120              | IMP dehydrogenase                           |
| Tb11.02.2740  | -30                                                         | -10                                                         | 30                   | 26                     | 26,3,1                     | 201,196,161         | 201                 | 26               | aspartate aminotransferase mitochondrial    |
| Tb11.01.8510  | -75                                                         | -25                                                         | 258                  | 220                    | 242,4,12                   | 170,193,782         | 170                 | 242              | t-complex protein                           |
