# Supplementary material for: Spliced Leader Trapping Reveals Widespread Alternative Splicing Patterns in the Highly Dynamic Transcriptome of Trypanosoma brucei
Source: PubMed Central journal article supplement (PMC2916883; doi:10.1371/journal.ppat.1001037), 2010-08-05
Supplement: ppat.1001037.s019.pdf [file ppat.1001037.s019.pdf]

Table S6: Comparison of expression levels from differential splice sites using RT qPCR and SLT

| <b>ID</b>        | <b>Long<br/>slender/procyclics<br/>qPCR</b> | <b>ci min<br/>(95%)<br/>qPCR</b> | <b>ci max<br/>(95%)<br/>qPCR</b> | <b>Long<br/>slender/procyclics<br/>SLT</b> | <b>Pearson</b> |
|------------------|---------------------------------------------|----------------------------------|----------------------------------|--------------------------------------------|----------------|
| Tb927.1.790up    | 1.03                                        | 0.84                             | 1.26                             | 2.11                                       | 0.85           |
| Tb927.1.790down  | 2.69                                        | 2.26                             | 3.20                             | 2.80                                       |                |
| Tb11.02.2700up   | 1.37                                        | 0.93                             | 2.02                             | 1.00                                       |                |
| Tb11.02.2700down | 2.66                                        | 1.36                             | 5.23                             | 1.47                                       |                |
| Tb927.6.4240up   | 1.29                                        | 0.94                             | 1.78                             | 1.00                                       |                |
| Tb927.6.4240down | 5.50                                        | 3.87                             | 7.82                             | 4.05                                       |                |

ci 95% confidence interval

up and down refers to the up- and downstream splice sites
