# Supplementary material for: Spliced Leader Trapping Reveals Widespread Alternative Splicing Patterns in the Highly Dynamic Transcriptome of Trypanosoma brucei
Source: PubMed Central journal article supplement (PMC2916883; doi:10.1371/journal.ppat.1001037), 2010-08-05
Supplement: ppat.1001037.s020.pdf [file ppat.1001037.s020.pdf]

**Table S7: Alternative splicing and dual localization of tRNA Synthetases**

| <b>Aminoacyl tRNA Synthetases (RS) with two genome-encoded isoforms</b>                           |                           |                      |                       |                  |                           |                       |                        |
|---------------------------------------------------------------------------------------------------|---------------------------|----------------------|-----------------------|------------------|---------------------------|-----------------------|------------------------|
| Gene ID                                                                                           | Name <sup>1</sup>         | MTS (p) <sup>2</sup> | MTS (aa) <sup>3</sup> | TPM <sup>4</sup> | tN-term (aa) <sup>5</sup> | iMTS (p) <sup>6</sup> | iMTS (aa) <sup>7</sup> |
| Tb10.70.6800                                                                                      | aspartyl-RS, <b>M</b>     | 0.91                 | 72                    | 107              | -                         | -                     | -                      |
| Tb927.6.1880                                                                                      | aspartyl-RS, <b>C</b>     | 0.02                 | np                    | 11               | -                         | -                     | -                      |
| Tb927.6.1510                                                                                      | lysyl-RS, <b>M</b>        | 0.99                 | 28                    | 61               | -                         | -                     | -                      |
| Tb927.8.1600                                                                                      | lysyl-RS, <b>C</b>        | 0.23                 | np                    | 225              | -                         | -                     | -                      |
| Tb927.8.2240                                                                                      | tryptophanyl-RS, <b>M</b> | 0.26                 | 28                    | 1                | -                         | -                     | -                      |
| Tb927.3.5580                                                                                      | tryptophanyl-RS, <b>C</b> | 0.08                 | np                    | 55               | -                         | -                     | -                      |
| Tb927.7.2400                                                                                      | tyrosyl-RS, <b>M</b>      | 0.64                 | np                    | 1                | -                         | -                     | -                      |
| Tb927.7.3620                                                                                      | tyrosyl-RS, <b>C</b>      | 0.0277               | np                    | 24               | -                         | -                     | -                      |
| <b>Aminoacyl tRNA Synthetases (RS) where alternative splicing could lead to dual localization</b> |                           |                      |                       |                  |                           |                       |                        |
| Tb927.4.2310                                                                                      | asparaginyl-RS,           | 0.95                 | 49                    | 62               | -                         | -                     | -                      |
| Tb10.389.0630                                                                                     | prolyl-RS,                | 0.98                 | 102                   | 145              | -                         | -                     | -                      |
| Tb09.160.3730                                                                                     | glutaminy-RS,             | 0.96                 | 30                    | 295              | -                         | -                     | -                      |
| Tb927.6.4590                                                                                      | glutamyl-RS,              | 0.91                 | 20                    | 13               | -                         | -                     | -                      |
| Tb10.6k15.1220                                                                                    | isoleucyl-RS,             | 0.81                 | 43                    | 120              | -                         | -                     | -                      |
| <b>Aminoacyl tRNA Synthetases (RS) with one isoform with potential internal MTS (iMTS)</b>        |                           |                      |                       |                  |                           |                       |                        |
| Tb11.46.0008                                                                                      | arginyl-RS,               | 0.12                 | np                    | 155              | 101                       | 0.87                  | np                     |
| Tb927.6.950                                                                                       | cysteinyl-RS,             | 0.01                 | np                    | 1                | 73                        | 0.71                  | np                     |
| Tb927.6.2060                                                                                      | histidyl-RS,              | 0.14                 | np                    | 2                | 48                        | 0.82                  | 49                     |
| Tb11.02.5020                                                                                      | leucyl-RS,                | 0.07                 | np                    | 20               | 49                        | 0.90                  | 26                     |
| <b>Aminoacyl tRNA Synthetases (RS) with unknown localization mechanisms</b>                       |                           |                      |                       |                  |                           |                       |                        |
| Tb927.6.700                                                                                       | alanyl-RS,                | 0.20                 | np                    | 69               | -                         | -                     | -                      |
| Tb927.8.5330                                                                                      | tyrosyl/methionyl-RS,     | 0.27                 | np                    | 216              | -                         | -                     | -                      |
| Tb10.70.6470                                                                                      | methionyl-RS,             | 0.37                 | np                    | 45               | -                         | -                     | -                      |
| Tb11.22.0005                                                                                      | phenylalanyl-RS (beta)    | 0.27                 | np                    | 3                | -                         | -                     | -                      |
| Tb11.01.5710                                                                                      | phenylalanyl-RS (alpha)   | 0.45                 | np                    | 122              | -                         | -                     | -                      |
| Tb11.01.1400                                                                                      | glycyl-RS,                | 0.24                 | np                    | 3                | -                         | -                     | -                      |
| Tb927.5.1090                                                                                      | threonyl-RS,              | 0.03                 | np                    | 27               | -                         | -                     | -                      |
| Tb927.6.4480                                                                                      | valyl-RS,                 | 0.12                 | np                    | 29               | -                         | -                     | -                      |
| Tb11.02.5020                                                                                      | seryl-RS,                 | 0.05                 | np                    | 20               | -                         | -                     | -                      |

<sup>1</sup> Name of tRNA S., M represents the mitochondrial isoform, C represents the cytosolic isoform

<sup>2</sup> Mitochondrial targeting signal prediction probability as determined using MITOPROT.

<sup>3</sup> Length of the mitochondrial targeting signal determined using MITOPROT; np: not predictable.

<sup>4</sup> Tags per million (TPM) of the major splice site as determined by SLT.

<sup>5</sup> N-terminal truncation (tN-term) by internal splice site, length of the truncation in amino acids (aa)

<sup>6</sup> Mitochondrial targeting signal prediction probability of the internal targeting sequence as determined using MITOPROT.

<sup>7</sup> Length of the internal mitochondrial targeting signal as determined using MITOPROT; np: not predictable.
