# Supplementary material for: Spliced Leader Trapping Reveals Widespread Alternative Splicing Patterns in the Highly Dynamic Transcriptome of Trypanosoma brucei
Source: PLOS journal article supplement (doi:10.1371/journal.ppat.1001037), 2010-08-05
Supplement: S12 (10.1371/journal.ppat.1001037.s012) [file journal.ppat.1001037.s012]

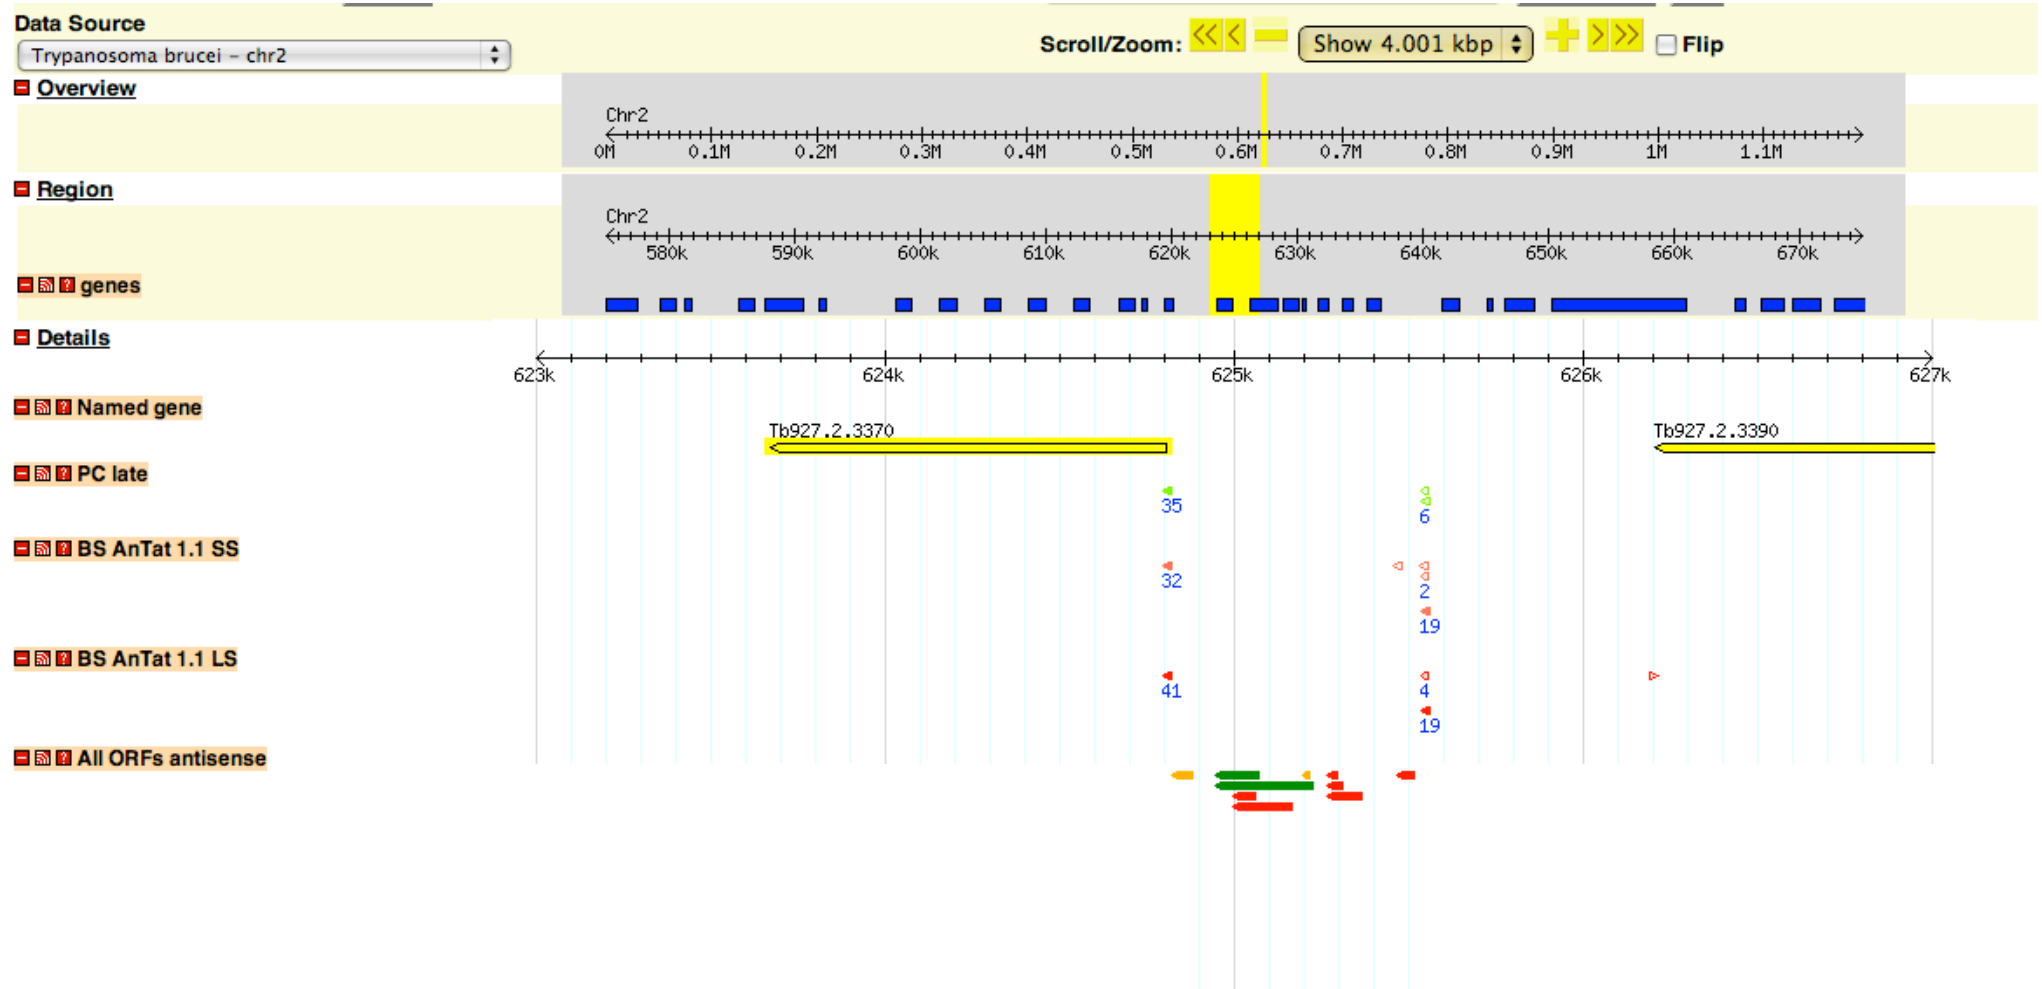

Figure S12
